# Supplementary material for: Soil Sulfur Deficiency Restricts Canola (Brassica napus) Productivity in Northwestern Russia Regardless of NPK Fertilization Level
Source: MDPI journal article supplement (doi:10.3390/agriculture13071409), 2023-07-15
Supplement: s1 [file s1]

Table S3. Descriptive statistics of canola yield ( $\text{t ha}^{-1}$ ) under different NPK treatments at the studied sites for 2012-2015.

|       | Control* | N <sub>65</sub> P <sub>50</sub> K <sub>50</sub> | N <sub>100</sub> P <sub>75</sub> K <sub>75</sub> |
|-------|----------|-------------------------------------------------|--------------------------------------------------|
| Mean  | 1.03     | 1.31                                            | 1.30                                             |
| SE    | 0.11     | 0.13                                            | 0.12                                             |
| Min   | 0.81     | 0.99                                            | 1.10                                             |
| Max   | 1.28     | 1.55                                            | 1.60                                             |
| CV, % | 21       | 20                                              | 19                                               |

\*Unfertilized
