# Supplementary material for: Soil Sulfur Deficiency Restricts Canola (Brassica napus) Productivity in Northwestern Russia Regardless of NPK Fertilization Level
Source: MDPI journal article supplement (doi:10.3390/agriculture13071409), 2023-07-15
Supplement: s1 [file s1]

Table S1. Content of sand fraction (0.05-2.0 mm) in different soil horizons of Albic Retisol in the studied area.

| SH* (cm)     | Sand, % |
|--------------|---------|
| Ap (0-23)    | 76.5    |
| AE (23-47)   |         |
| B (47-66)    | 90.2    |
| C1 (66-72)   | 92.0    |
| C2 (72-144)  | 88.6    |
| C3 (144-170) | 98.7    |

\*SH, soil horizon according to FAO Guidelines for Soil Description: Ap, surface humus-accumulative mineral horizon with ploughing; A/E, humus-eluvial mineral horizon with slight loss of silicate clay, iron, aluminium; B, underlying illuvial mineral horizon; C1, C2 and C3, different layers of parent material represented by moraine deposits, lacustrine-glacial sands.
