# Supplementary material for: Soil Sulfur Deficiency Restricts Canola (Brassica napus) Productivity in Northwestern Russia Regardless of NPK Fertilization Level
Source: MDPI journal article supplement (doi:10.3390/agriculture13071409), 2023-07-15
Supplement: s1 [file s1]

Table S2. Descriptive statistics of soil properties (0-20 cm;  $n = 12$ ) at the studied sites.

|       | pH <sub>KCl</sub> | SOC<br>(%) | AN  | P  | K  | S    | SB<br>(cmol kg <sup>-1</sup> ) |
|-------|-------------------|------------|-----|----|----|------|--------------------------------|
| Mean  | 4.6               | 2.0        | 107 | 58 | 38 | 0.91 | 2.6                            |
| SE    | 0.1               | 0.1        | 6   | 4  | 2  | 0.09 | 0.4                            |
| Min   | 4.3               | 1.6        | 74  | 42 | 33 | 0.47 | 1.0                            |
| Max   | 5.0               | 2.4        | 151 | 83 | 58 | 1.50 | 4.6                            |
| CV, % | 5                 | 14         | 20  | 23 | 17 | 33   | 49                             |

SE, standard error; Min, minimum; Max, maximum; CV, coefficient of variation
